# Supplementary material
Source: Springer Nature journal article supplement (https://www.springermedizin.de/resource/supplementary/12879_2002_55_MOESM1_ESM.pdf/9448058)
Supplement: MOESM1 [file 9448058]

**a****CXCR4 extracellular domains**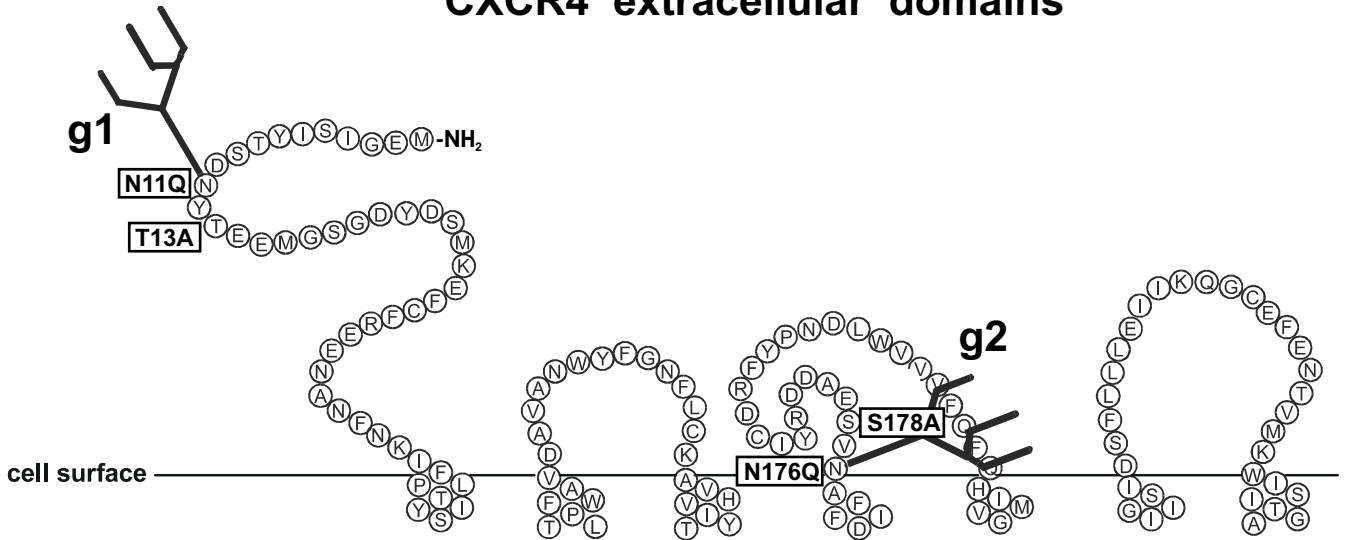**b****CXCR4 mutants generated**

| CXCR4      | glycosylation sites |     |
|------------|---------------------|-----|
|            | g1                  | g2  |
| wt         | NYT                 | NVS |
| N11Q       | Q--                 | --- |
| N176Q      | ---                 | Q-- |
| N11Q/N176Q | Q--                 | Q-- |
| T13A       | --A                 | --- |
| S178A      | ---                 | --A |
